# Supplementary material for: TET-mediated DNA demethylation controls gastrulation by regulating Lefty–Nodal signalling
Source: Springer Nature journal article supplement (doi:10.1038/nature20095), 2016-10-01

Extended Data Figure 1a

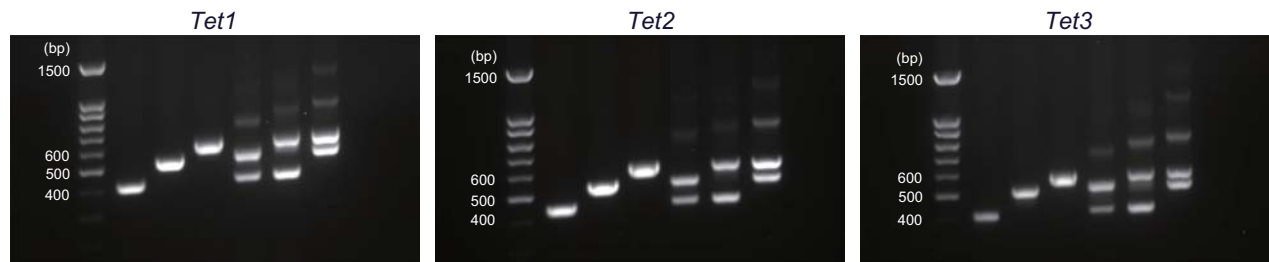

Extended Data Figure 1b

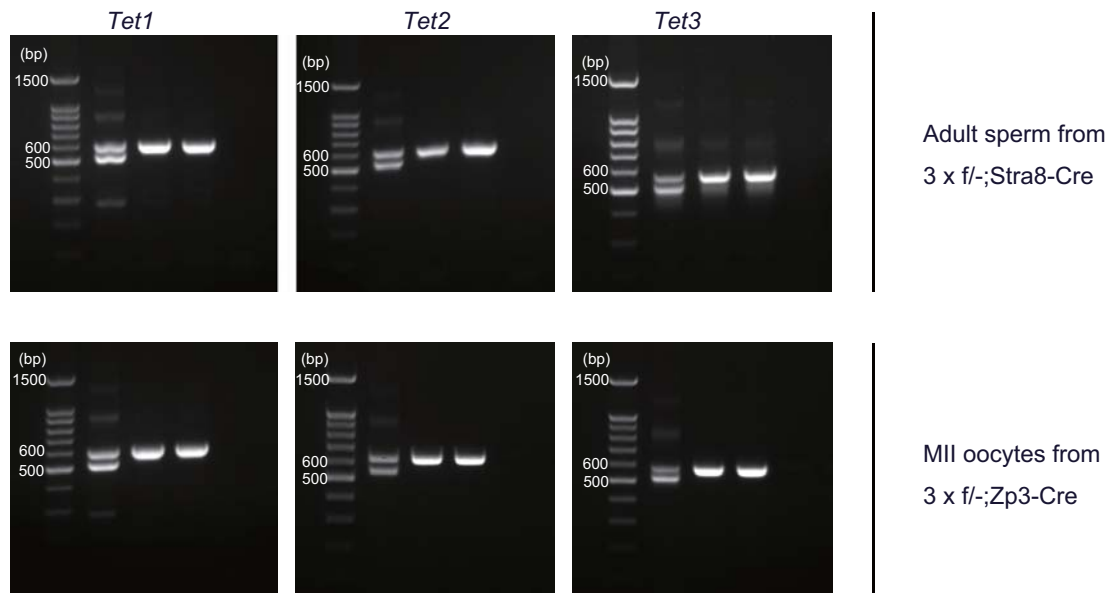

Supplement: 41586_2016_BFnature20095_MOESM101_ESM.pdf [file 41586_2016_BFnature20095_MOESM101_ESM.pdf]
